# Supplementary material
Source: PubMed Central journal article supplement (PMC7643203)
Supplement: ao0c03902_si_001.pdf [file ao0c03902_si_001.pdf]

# **Co-axial electrospun nanofibers with different shell contents to control cell adhesion and viability**

Jae Keun Park<sup>a</sup>, Oanh-Vu Pham-Nguyen<sup>a</sup>, Hyuk Sang Yoo<sup>a,b,\*</sup>

<sup>a</sup>Department of Biomedical Materials Engineering, Kangwon National University, Chuncheon 24341, Republic of Korea.

<sup>b</sup>Institute of Bioscience and Biotechnology, Kangwon National University, Chuncheon 24341, Republic of Korea.

\*Corresponding author: Hyuk Sang Yoo ([hsyoo@kangwon.ac.kr](mailto:hsyoo@kangwon.ac.kr)); website: <http://nano-bio.kangwon.ac.kr>

## **Supplementary information**

**a**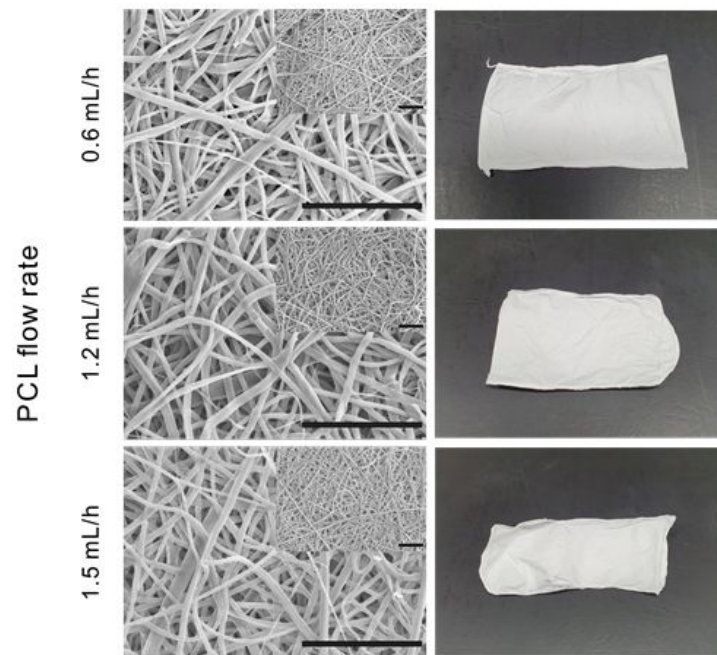**b**

| Flow rate (mL/h)      |                          | Diameter (nm) |
|-----------------------|--------------------------|---------------|
| PCL (23%, w/v, shell) | Gelatin (15%, w/v, core) |               |
| 0.6                   |                          | 463.8±79.2    |
| 1.2                   | 0.3                      | 510.3±68.6    |
| 1.5                   |                          | 570.3±69.5    |

**Figure S1.** Characterization of P@G nanofiber with different flow rate of PCL. (a) Scanning electron microscopy images of P@G nanofiber with PCL flow rate: 0.6, 1.2, 1.5 mL/h and digital image of nanofibrous mats. (Scale bar = 10 μm, inset image scale bar =10 μm). (b) Diameter of P@G nanofiber (n = 40) measured by ImageJ software.

**Table S1.** Parameters for deconvolution of XPS spectra.

| Sample   | Elements | Peak position (eV) | FWHM <sup>a</sup> (eV) | Area                       | Atomic concentration (%) |
|----------|----------|--------------------|------------------------|----------------------------|--------------------------|
| 100P@GNF | C 1s     | 284.93             | 2.83                   | 18.169 x 10 <sup>3</sup>   | 77.49                    |
|          | O 1s     | 532.26             | 3.09                   | 5.277 x 10 <sup>3</sup>    | 22.51                    |
| 80P@GNF  | C 1s     | 285.15             | 2.92                   | 38.940 x 10 <sup>3</sup>   | 76.23                    |
|          | O 1s     | 532.5              | 3.22                   | 11.403 x 10 <sup>3</sup>   | 22.33                    |
|          | N 1s     | 399.89             | 2.71                   | 0.736 x 10 <sup>3</sup>    | 1.44                     |
| 50P@GNF  | C 1s     | 295.08             | 3.02                   | 23.804 x 10 <sup>3</sup>   | 74.83                    |
|          | O 1s     | 540.58             | 4.25                   | 7.194 x 10 <sup>3</sup>    | 22.61                    |
|          | N 1s     | 400.03             | 3.37                   | 0.814 x 10 <sup>3</sup>    | 2.56                     |
| 0P@GNF   | C 1s     | 284.53             | 4.38                   | 1553.609 x 10 <sup>3</sup> | 61.90                    |
|          | O 1s     | 535.08             | 3.19                   | 1223.182 x 10 <sup>3</sup> | 19.40                    |
|          | N 1s     | 403.08             | 2.96                   | 741.164 x 10 <sup>3</sup>  | 18.70                    |

<sup>a</sup> FWHM: Full width at half maximum
